# Supplementary material
Source: PubMed Central journal article supplement (PMC5839987)
Supplement: NIHMS932825-supplement-Supp_Mat.pdf [file NIHMS932825-supplement-Supp_Mat.pdf]

**Table S1: Primers for real-time PCRs of RA signaling downstream genes**

| <b>Gene name</b> | <b>Forward</b>         | <b>Reverse</b>         |
|------------------|------------------------|------------------------|
| <i>Rarb</i>      | accacctcccagtgat       | gctgtactctgtgtctcgatg  |
| <i>Crabp1</i>    | aaggtcggagaggcttc      | tgtgcagtgaatcttgttctca |
| <i>Wnt11</i>     | caggatccaagccaataaa    | tccagggaggcacgtaga     |
| <i>Cdh2</i>      | gccatcatcgctatccttct   | cgtttcatccataccacaaa   |
| <i>Foxa1</i>     | cgcaggtacgagtttcgtg    | cgctctctcccatttgc      |
| <i>Hoxb1</i>     | aagagaaaccacctaagacagc | tgaagtttgtcggagacc     |
| <i>Casp3</i>     | gaggctgacttctgtatgctt  | aaccacgaccgtcctt       |
| <i>Pou5f1</i>    | gttgagaaggtggaaccaa    | ctccttctgcagggttctc    |
| <i>GFP</i>       | cttcagctaccgctacgagg   | gctgcatccagatcggtat    |
| <i>Gapdh</i>     | aagagggatgctgcccttac   | ccattttgtctacgggacga   |

**Table S2: Summary for significant association of common variants with risk of NTDs**

| Gene symbol    | SNP ID     | Genomic position | Ref allele | Alt allele | HOMR/HET/HOMA in NTD | HOMR/HET/HOMA in controls | HWE in controls | OR(95% CI)          | P value |
|----------------|------------|------------------|------------|------------|----------------------|---------------------------|-----------------|---------------------|---------|
| <b>CRABP2</b>  | rs12039622 | chr1:156669917   | T          | C          | 284/67/4             | 186/28/1                  | 1               | 1.60<br>(1.00-2.57) | 0.049   |
| <b>CYP26B1</b> | rs917896   | chr2:72374435    | C          | T          | 0/45/269             | 0/39/137                  | 0.14            | 1.70<br>(1.06-2.74) | 0.029   |
| <b>ALDH1A2</b> | rs4646579  | chr15:58329528   | G          | C          | 194/119/16           | 105/71/20                 | 0.16            | 0.45<br>(0.23-0.89) | 0.022   |
| <b>ALDH1A2</b> | rs4238328  | chr15:58338651   | G          | A          | 228/109/18           | 115/83/13                 | 0.86            | 0.67<br>(0.47-0.94) | 0.022   |

SNP ID is referred as dbSNP in NCBI.

Genomic position is referenced from the human genome in UCSC (hg19/GRCh37).

HOMR: homozygous reference genotype; HET: heterozygous genotypes; HOMA: homozygous alternative genotype.

HWE: Hardy-Weinberg equilibrium.

OR: odds ratio

**Table S3: Constraint metrics of targeted genes in the present cohort**

| <b>Gene symbol</b>    | <b>Constraint from ExAC</b> | <b>Expected no. variants</b> | <b>Observed no. variants</b> | <b>Constraint Metrics</b> |
|-----------------------|-----------------------------|------------------------------|------------------------------|---------------------------|
| <b><i>ALDH1A2</i></b> | <b>Synonymous</b>           | 78.6                         | 90                           | $z = -0.80$               |
|                       | <b>Missense</b>             | 176.4                        | 141                          | $z = 1.30$                |
|                       | <b>LoF</b>                  | 19.1                         | 4                            | $pLI = 0.52$              |
|                       | <b>CNV</b>                  | 8.6                          | 32                           | $z = -1.62$               |
| <b><i>CYP26A1</i></b> | <b>Synonymous</b>           | 109                          | 98                           | $z = 0.65$                |
|                       | <b>Missense</b>             | 223.9                        | 168                          | $z = 1.83$                |
|                       | <b>LoF</b>                  | 15.5                         | 9                            | $pLI = 0.00$              |
|                       | <b>CNV</b>                  | 4.0                          | 2                            | $z = 0.38$                |
| <b><i>CYP26B1</i></b> | <b>Synonymous</b>           | 117.1                        | 116                          | $z = 0.07$                |
|                       | <b>Missense</b>             | 239.3                        | 174                          | $z = 2.06$                |
|                       | <b>LoF</b>                  | 9.4                          | 0                            | $pLI = 0.95$              |
|                       | <b>CNV</b>                  | 3.0                          | 2                            | $z = 0.20$                |
| <b><i>CRABP1</i></b>  | <b>Synonymous</b>           | 34.4                         | 28                           | $z = 0.67$                |
|                       | <b>Missense</b>             | 61.5                         | 35                           | $z = 1.65$                |
|                       | <b>LoF</b>                  | 5.2                          | 2                            | $pLI = 0.13$              |
|                       | <b>CNV</b>                  | 6.2                          | 1                            | $z = 0.94$                |
| <b><i>CRABP2</i></b>  | <b>Synonymous</b>           | 25.5                         | 27                           | $z = -0.19$               |
|                       | <b>Missense</b>             | 47.6                         | 48                           | $z = -0.03$               |
|                       | <b>LoF</b>                  | 6.7                          | 4                            | $pLI = 0.01$              |
|                       | <b>CNV</b>                  | 3.6                          | 0                            | $z = 0.80$                |
| <b><i>RARA</i></b>    | <b>Synonymous</b>           | 87.9                         | 101                          | $z = -0.87$               |
|                       | <b>Missense</b>             | 182.1                        | 83                           | $z = 3.59$                |
|                       | <b>LoF</b>                  | 12.8                         | 1                            | $pLI = 0.93$              |
|                       | <b>CNV</b>                  | 4.6                          | 1                            | $z = 0.70$                |

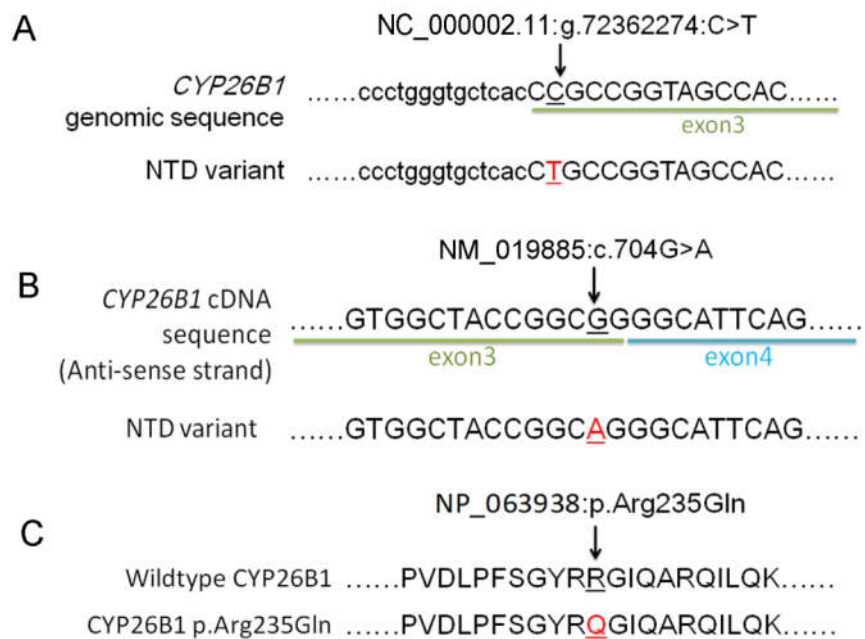

**FIGURE S1: Schematic of *CYP26B1* variant NC\_000002.11:g.72362274:C>T NP\_063938:p.(Arg235Gln) splicing and missense mutation**

A) Genomic DNA sequence of the *CYP26B1* exon 3/intron region showing the reference sequence and NTD-variant sequence at g.72362274:C>T p.(Arg235Gln) from GRCh37/hg19. The base change in the NTD variant from C to T is shown in red. Upper case letters indicate exon 3 sequence and lower case letters indicate intronic sequence. The cDNA (B; anti-sense strand) and protein (C) sequences of reference and NTD-specific g.72362274:C>T p.(Arg235Gln) variant are also shown. The red font "A" is the altered allele from the reference "G" in the cDNA sequence; the red "Q" indicates predicted amino acid change from arginine (R) to glutamine (Q).

**A**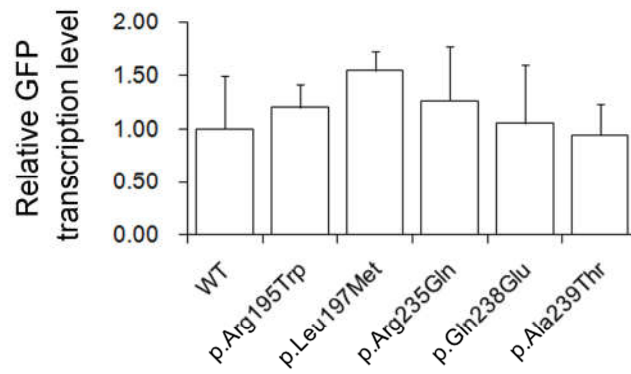**B**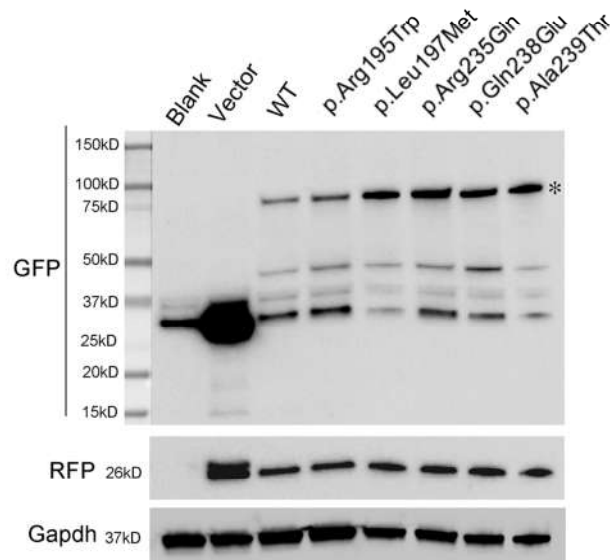**FIGURE S2: Transfection efficiency in NE-4C cells**

A) Real-time PCR results for *GFP* expression from the *CYP26B1-GFP fusion* show that the transfection efficiencies between WT and mutants are not significantly different. All results in mutants were normalized by WT. B) Western blot image showing proteins expressed following transfection of NE-4C cells with WT or mutant *CYP26B1-GFP fusion* plasmids and RFP transfection control plasmid. Asterisk on right indicates the expected size of the *CYP26B1-GFP fusion* protein. Gapdh was used as a control for protein loading.

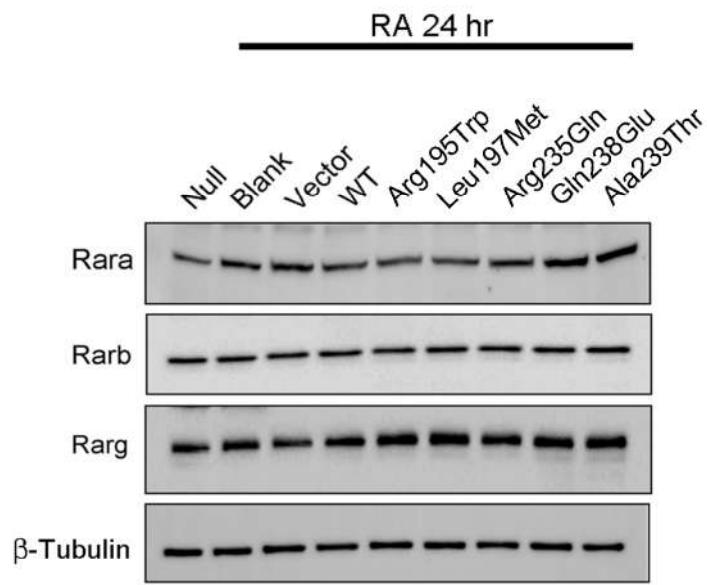

**FIGURE S3:** Western blots indicate the relative protein expression of RA receptors 24 hours after RA-treatment of NE-4C cells transfected with *CYP26B1* WT or mutant plasmids.
